# Supplementary material
Source: publisher figshare collection journal article supplement (https://sage.figshare.com/ndownloader/files/15482921)
Supplement: Supplementary file 1 [file 15482921]

**Supplemental Table 1 (online only). Codes for outcome definitions**

| <b>Outcome</b>        | <b>Code Type</b> | <b>Code</b>                     | <b>Description</b>                                                                                                                                                                                         |
|-----------------------|------------------|---------------------------------|------------------------------------------------------------------------------------------------------------------------------------------------------------------------------------------------------------|
| Myocardial infarction | ICD-9 diagnosis  | 410.xx                          | Acute myocardial infarction                                                                                                                                                                                |
| Myocardial ischemia   | ICD-9 diagnosis  | 414.xx<br>(excluding 414.1x)    | Other forms of chronic ischemic heart disease<br>(excluding aneurysm and dissection of heart)                                                                                                              |
| Unstable angina       | ICD-9 diagnosis  | 411.1                           | Intermediate coronary syndrome                                                                                                                                                                             |
|                       | ICD-9 diagnosis  | 411.8, 411.81,<br>411.89        | Other acute coronary occlusion                                                                                                                                                                             |
|                       | ICD-9 proc       | 36.33                           | Endoscopic transmyocardial revascularization                                                                                                                                                               |
|                       | ICD-9 proc       | 36.03                           | Open chest coronary artery angioplasty                                                                                                                                                                     |
|                       | ICD-9 proc       | 36.09                           | Other removal of coronary artery obstruction                                                                                                                                                               |
|                       | ICD-9 proc       | 36.1x                           | Aortocoronary bypass for heart revascularization                                                                                                                                                           |
|                       | ICD-9 proc       | 36.2                            | Heart revascularization by arterial implant                                                                                                                                                                |
|                       | ICD-9 proc       | 36.31                           | Open chest transmyocardial revascularization                                                                                                                                                               |
|                       | ICD-9 proc       | 36.07                           | Insertion of drug-eluting coronary artery stent(s)                                                                                                                                                         |
|                       | ICD-9 proc       | 36.34                           | Percutaneous transmyocardial revascularization                                                                                                                                                             |
|                       | ICD-9 proc       | 36.32                           | Other transmyocardial revascularization                                                                                                                                                                    |
|                       | ICD-9 proc       | 36.39                           | Other heart revascularization                                                                                                                                                                              |
|                       | CPT              | 33141                           | Transmyocardial laser revascularization, by<br>thoracotomy; performed at the time of other open<br>cardiac procedure(s)                                                                                    |
|                       | CPT              | 33508                           | Endoscopy, surgical, including video-assisted<br>harvest of vein(s) for coronary artery bypass<br>procedure                                                                                                |
|                       | CPT              | 33517 – 33519,<br>33521 – 33523 | Coronary artery bypass, using venous graft(s) and<br>arterial graft(s)                                                                                                                                     |
|                       | CPT              | 33530                           | Reoperation, coronary artery bypass procedure or<br>valve procedure, more than 1 month after original<br>operation                                                                                         |
|                       | CPT              | 33572                           | Coronary endarterectomy, open, any method, of<br>left anterior descending, circumflex, or right<br>coronary artery performed in conjunction with<br>coronary artery bypass graft procedure, each<br>vessel |
|                       | CPT              | 35500                           | Harvest of upper extremity vein, 1 segment, for<br>lower extremity or coronary artery bypass<br>procedure                                                                                                  |
|                       | CPT              | 35572                           | Harvest of femoropopliteal vein, 1 segment, for<br>vascular reconstruction procedure (e.g., aortic,<br>vena caval, coronary, peripheral artery)                                                            |
|                       | CPT              | 35600                           | Harvest of upper extremity artery, 1 segment, for<br>coronary artery bypass procedure                                                                                                                      |
|                       | CPT              | 00566                           | Anesthesia for direct coronary artery bypass<br>grafting; without pump oxygenator                                                                                                                          |
|                       | CPT              | 00567                           | Anesthesia for direct coronary artery bypass<br>grafting; with pump oxygenator                                                                                                                             |
|                       | CPT              | 33140                           | Transmyocardial laser revascularization, by<br>thoracotomy; (separate procedure)                                                                                                                           |
|                       | CPT              | 33510 – 33516                   | Coronary artery bypass, vein only                                                                                                                                                                          |
|                       | CPT              | 33533 – 33536                   | Coronary artery bypass, using arterial graft(s)                                                                                                                                                            |

|                                                      |                  |                  |                                                                                                                                                                    |
|------------------------------------------------------|------------------|------------------|--------------------------------------------------------------------------------------------------------------------------------------------------------------------|
|                                                      | CPT              | 92973            | Percutaneous transluminal coronary thrombectomy                                                                                                                    |
|                                                      | CPT              | 92980            | Transcatheter placement of an intracoronary stent(s), percutaneous, with or without other therapeutic intervention, any method; single vessel                      |
|                                                      | CPT              | 92981            | Transcatheter placement of an intracoronary stent(s), percutaneous, with or without other therapeutic intervention, any method; each additional vessel             |
|                                                      | CPT              | 92982            | Percutaneous transluminal coronary balloon angioplasty; single vessel                                                                                              |
|                                                      | CPT              | 92984            | Percutaneous transluminal coronary balloon angioplasty; each additional vessel                                                                                     |
|                                                      | CPT              | 92996            | Percutaneous transluminal coronary atherectomy, by mechanical or other method, with or without balloon angioplasty; each additional vessel                         |
|                                                      | CPT              | 92975            | Thrombolysis, coronary; by intracoronary infusion, including selective coronary angiography                                                                        |
|                                                      | CPT              | 92977            | Thrombolysis, coronary; by intravenous infusion                                                                                                                    |
|                                                      | CPT              | 92995            | Percutaneous transluminal coronary atherectomy, by mechanical or other method, with or without balloon angioplasty; single vessel                                  |
|                                                      | HCPCS            | S2205 – S2209    | Minimally invasive direct coronary artery bypass surgery involving mini-thoracotomy or mini-sternotomy surgery, performed under direct vision                      |
|                                                      | HCPCS            | C9600 – C9606    | Percutaneous transcatheter placement of drug-eluting intracoronary stent(s), with coronary angioplasty when performed                                              |
|                                                      | HCPCS            | G0290            | Transcatheter placement of a drug eluting intracoronary stent(s), percutaneous, with or without other therapeutic intervention, any method; single vessel          |
|                                                      | HCPCS            | G0291            | Transcatheter placement of a drug eluting intracoronary stent(s), percutaneous, with or without other therapeutic intervention, any method; each additional vessel |
| Ischemic stroke                                      | ICD-9 diagnosis  | 433.x1           | Occlusion and stenosis of precerebral arteries, with cerebral infarction                                                                                           |
|                                                      | ICD-9 diagnosis  | 434.x1           | Occlusion of cerebral arteries, with cerebral infarction                                                                                                           |
| Hemorrhagic stroke                                   | ICD-9 diagnosis  | 430              | Subarachnoid hemorrhage                                                                                                                                            |
|                                                      | ICD-9 diagnosis  | 431              | Intracerebral hemorrhage                                                                                                                                           |
|                                                      | ICD-9 diagnosis  | 432.0            | Nontraumatic extradural hemorrhage                                                                                                                                 |
|                                                      | ICD-9 diagnosis  | 432.1            | Subdural hemorrhage                                                                                                                                                |
|                                                      | ICD-9 diagnosis  | 432.9            | Unspecified intracranial hemorrhage                                                                                                                                |
| Transient ischemic attack                            | ICD-9 diagnosis  | 435.x            | Transient cerebral ischemia                                                                                                                                        |
| Mortality from cardiovascular/cerebrovascular causes | ICD-10 diagnosis | I21.x            | ST elevation (STEMI) and non-ST elevation (NSTEMI) myocardial infarction                                                                                           |
|                                                      | ICD-10 diagnosis | I22.x            | Subsequent ST elevation (STEMI) and non-ST elevation (NSTEMI) myocardial infarction                                                                                |
|                                                      | ICD-10 diagnosis | I25.x (excluding | Chronic ischemic heart disease (excluding                                                                                                                          |

|                            |                  |                  |                                                                                         |
|----------------------------|------------------|------------------|-----------------------------------------------------------------------------------------|
|                            |                  | I25.3 and I25.4) | aneurysm and dissection of heart)                                                       |
|                            | ICD-10 diagnosis | I20.0            | Unstable angina                                                                         |
|                            | ICD-10 diagnosis | I24.0            | Acute coronary thrombosis not resulting in myocardial infarction                        |
|                            | ICD-10 diagnosis | I24.9            | Acute ischemic heart disease, unspecified                                               |
|                            | ICD-10 diagnosis | I24.8            | Other forms of acute ischemic heart disease                                             |
|                            | ICD-10 diagnosis | I63.x            | Cerebral infarction, due to occlusion and stenosis of cerebral and precerebral arteries |
|                            | ICD-10 diagnosis | I60.x            | Nontraumatic subarachnoid hemorrhage                                                    |
|                            | ICD-10 diagnosis | I62.x            | Other and unspecified nontraumatic intracranial hemorrhage                              |
|                            | ICD-10 diagnosis | G45.x            | Transient cerebral ischemic attacks and related syndromes                               |
| Mortality from trauma      | ICD-10 diagnosis | S00.x-S09.x      | Injuries to the head                                                                    |
|                            | ICD-10 diagnosis | S10.x-S19.x      | Injuries to the neck                                                                    |
|                            | ICD-10 diagnosis | S20.x-S29.x      | Injuries to the thorax                                                                  |
|                            | ICD-10 diagnosis | S30.x-S39.x      | Injuries to the abdomen, lower back, lumbar spine, pelvis and external genitals         |
|                            | ICD-10 diagnosis | S40.x-S49.x      | Injuries to the shoulder and upper arm                                                  |
|                            | ICD-10 diagnosis | S50.x-S59.x      | Injuries to the elbow and forearm                                                       |
|                            | ICD-10 diagnosis | S60.x-S69.x      | Injuries to the wrist, hand and fingers                                                 |
|                            | ICD-10 diagnosis | S70.x-S79.x      | Injuries to the hip and thigh                                                           |
|                            | ICD-10 diagnosis | S80.x-S89.x      | Injuries to the knee and lower leg                                                      |
|                            | ICD-10 diagnosis | S90.x-S99.x      | Injuries to the ankle and foot                                                          |
|                            | ICD-10 diagnosis | T07.x            | Injuries involving multiple body regions                                                |
|                            | ICD-10 diagnosis | T14.x            | Injury of unspecified body region                                                       |
|                            | ICD-10 diagnosis | T15.x-T19.x      | Effects of foreign body entering through natural orifice                                |
|                            | ICD-10 diagnosis | T20.x-T25.x      | Burns and corrosions of external body surface, specified by site                        |
|                            | ICD-10 diagnosis | T26.x-T28.x      | Burns and corrosions confined to eye and internal organs                                |
|                            | ICD-10 diagnosis | T30.x-T32.x      | Burns and corrosions of multiple and unspecified body regions                           |
|                            | ICD-10 diagnosis | T33.x-T34.x      | Frostbite                                                                               |
|                            | ICD-10 diagnosis | T51.x - T65.x    | Toxic effects of substances chiefly nonmedicinal as to source                           |
|                            | ICD-10 diagnosis | T66.x - T78.x    | Other and unspecified effects of external causes                                        |
|                            | ICD-10 diagnosis | T79.x            | Certain early complications of trauma                                                   |
|                            | ICD-10 diagnosis | V01.x - V99.x    | Transport accidents                                                                     |
|                            | ICD-10 diagnosis | W00.x - X59.x    | Other external causes of accidental injury                                              |
|                            | ICD-10 diagnosis | X65.x - X69.x    | Intentional self-poisoning from nonmedicinal substances                                 |
|                            | ICD-10 diagnosis | X70.x - X84.x    | Intentional self-harm                                                                   |
|                            | ICD-10 diagnosis | X86.x - Y09.x    | Assault                                                                                 |
|                            | ICD-10 diagnosis | Y20.x - Y34.x    | Harm - undetermined intent                                                              |
|                            |                  | Y35.x - Y36.x    | Injury due to legal intervention or war operations                                      |
| Mortality ascribed to drug | ICD-10 diagnosis | T36.x - T50.x    | Poisoning by, adverse effect of and underdosing                                         |

|          |                  |               |                                                          |
|----------|------------------|---------------|----------------------------------------------------------|
| overdose |                  |               | of drugs, medicaments and biological substances          |
|          | ICD-10 diagnosis | X60.x - X64.x | Intentional self-poisoning from medicinal substances     |
|          | ICD-10 diagnosis | X85.x         | Assault by drugs, medicaments, and biological substances |
|          | ICD-10 diagnosis | Y10.x - Y19.x | Poisoning, undetermined intent                           |

**Supplemental Table 2. Variables included in the propensity score models for the migraine study population initiating prophylactic treatments**

|                                                                              | Topiramate vs. Cardiovascular Treatments | Topiramate vs. Anti-depressants | Topiramate vs. Other Anti-convulsants | Topiramate vs. Other Prophylactic Treatments |
|------------------------------------------------------------------------------|------------------------------------------|---------------------------------|---------------------------------------|----------------------------------------------|
| <b>Pre-defined covariates</b>                                                |                                          |                                 |                                       |                                              |
| Age groups (18-24, 25-44, 35-44, 45-54, 55-64, 65+)                          | x                                        | x                               | x                                     | x                                            |
| Age (continuous)                                                             | x                                        | x                               | x                                     | x                                            |
| Sex                                                                          | x                                        | x                               | x                                     | x                                            |
| Geographic region                                                            | x                                        | x                               | x                                     | x                                            |
| Calendar year                                                                | x                                        | x                               | x                                     | x                                            |
| Calendar month (January-March, April-June, July-September, October-December) | x                                        | x                               | x                                     | x                                            |
| Hypertension                                                                 | x                                        | x                               | x                                     | x                                            |
| Hypercholesterolemia                                                         | x                                        | x                               | x                                     | x                                            |
| Hypertension by calendar year                                                | x                                        | x                               | x                                     | x                                            |
| Hypercholesterolemia by calendar year                                        | x                                        | x                               | x                                     | x                                            |
| Age (continuous) by calendar year                                            | x                                        | x                               | x                                     | x                                            |
| ACE inhibitors (excluding drug initiation date)                              | x                                        | x                               | x                                     | x                                            |
| ARBs (excluding drug initiation date)                                        | x                                        | x                               | x                                     | x                                            |
| Beta-blockers (excluding drug initiation date)                               |                                          | x                               | x                                     | x                                            |
| Anti-depressants (excluding drug initiation date)                            |                                          |                                 | x                                     | x                                            |
| Anti-arrhythmics                                                             | x                                        |                                 |                                       |                                              |
| Aspirin/dipyridamole                                                         | x                                        |                                 |                                       |                                              |
| Dalteparin                                                                   |                                          | x                               | x                                     | x                                            |
| Fondaparinux                                                                 |                                          | x                               | x                                     | x                                            |
| Thiazide                                                                     |                                          | x                               | x                                     | x                                            |
| SNRIs (excluding drug initiation date)                                       | x                                        |                                 | x                                     | x                                            |
| Sympatholytic hypotensives (excluding drug initiation date)                  |                                          | x                               | x                                     | x                                            |
| Alpha blockers                                                               | x                                        | x                               | x                                     | x                                            |
| Loop diuretics                                                               | x                                        |                                 |                                       |                                              |
| Nitroglycerin                                                                | x                                        | x                               | x                                     | x                                            |
| Other anticonvulsant use (excluding drug initiation date)                    | x                                        | x                               |                                       | x                                            |
| Other prophylactic treatments (excluding drug initiation date)               | x                                        | x                               | x                                     |                                              |
| Potassium sparing diuretics                                                  | x                                        |                                 |                                       |                                              |
| Migraine aura                                                                | x                                        | x                               | x                                     | x                                            |

|                                                                                                    |   |   |   |   |
|----------------------------------------------------------------------------------------------------|---|---|---|---|
| Cardiac arrhythmia                                                                                 | x | x | x | x |
| Congestive heart failure                                                                           | x | x | x | x |
| Depression                                                                                         | x |   |   |   |
| Obesity                                                                                            | x | x | x | x |
| Pregnancy, non-delivery indicators, within 30 days prior                                           | x | x | x | x |
| Renal disease                                                                                      | x |   |   |   |
| Unstable angina/coronary revascularization                                                         | x | x | x | x |
| Number of physician visits (continuous)                                                            | x |   |   |   |
| Number of unique medications dispensed (continuous)                                                | x | x | x | x |
| Number of procedures (continuous)                                                                  | x |   |   |   |
| Switch new user of prophylactic treatment                                                          | x | x | x | x |
| Emergency room visit within 30 days of prophylactic treatment                                      |   | x | x | x |
| Hospitalization within 30 days of prophylactic treatment initiation                                | x | x | x | x |
| Total costs (\$) (continuous)                                                                      |   | x | x | x |
| <b>Empirically identified covariates</b>                                                           |   |   |   |   |
| <i>Diagnoses</i>                                                                                   | x |   |   |   |
| Viral and chlamydial infection in conditions classified elsewhere and of specific site (ICD-9 079) |   | x | x | x |
| Benign neoplasm of skin (ICD-9 216)                                                                | x | x | x | x |
| Episodic mood disorders (ICD-9 296)                                                                |   | x | x | x |
| Anxiety, dissociative and somatoform disorders (ICD-9 300)                                         | x | x | x | x |
| Special symptoms or syndromes, not elsewhere classified (ICD-9 307)                                |   | x | x | x |
| Depressive disorder, not elsewhere classified (ICD-9 311)                                          |   | x | x | x |
| Organic sleep disorders (ICD-9 327)                                                                | x | x | x | x |
| Migraine (ICD-9 346)                                                                               | x | x | x | x |
| Other disorders of brain (ICD-9 348)                                                               |   | x | x | x |
| Mononeuritis of upper limb and mononeuritis multiplex (ICD-9 354)                                  | x |   |   |   |
| Other disorders of eye (ICD-9 379)                                                                 | x | x | x | x |
| Cardiac dysrhythmias (ICD-9 427)                                                                   | x |   |   |   |
| Acute sinusitis (ICD-9 461)                                                                        |   | x | x | x |
| Chronic sinusitis (ICD-9 473)                                                                      | x |   |   |   |
| Other diseases of upper respiratory tract (ICD-9 478)                                              |   | x | x | x |
| Functional digestive disorders, not elsewhere classified (ICD-9 564)                               |   | x | x | x |

|                                                                        |   |   |   |   |
|------------------------------------------------------------------------|---|---|---|---|
| Menopausal and postmenopausal disorders (ICD-9 627)                    | x | x | x | x |
| Diseases of sebaceous glands (ICD-9 706)                               | x |   |   |   |
| Osteoarthritis and allied disorders (ICD-9 715)                        | x | x | x | x |
| Other and unspecified disorders of joint (ICD-9 719)                   | x | x | x | x |
| Spondylosis and allied disorders (ICD-9 721)                           | x |   |   |   |
| Other disorders of bone and cartilage (ICD-9 733)                      |   | x | x | x |
| General symptoms (ICD-9 780)                                           | x |   |   |   |
| Symptoms involving nervous and musculoskeletal systems (ICD-9 781)     | x |   |   |   |
| Symptoms involving skin and other integumentary tissue (ICD-9 782)     |   | x | x | x |
| Symptoms concerning nutrition, metabolism, and development (ICD-9 783) | x | x | x | x |
| Symptoms involving head and neck (ICD-9 784)                           | x | x | x | x |
| Symptoms involving cardiovascular system (ICD-9 785)                   | x | x | x | x |
| Nonspecific abnormal results of function studies (ICD-9 794)           | x |   |   |   |
| Other nonspecific abnormal findings (ICD-9 796)                        | x | x | x | x |
| Sprains and strains of other and unspecified parts of back (ICD-9 847) | x |   |   |   |
| Contraceptive management (ICD-9 V25)                                   | x | x | x | x |
| Other postprocedural status (ICD-9 V45)                                | x |   |   | x |
| General medical examination (ICD-9 V70)                                |   | x | x | x |
| Special screening for malignant neoplasms (ICD-9 V76)                  | x | x | x | x |
| <i>Medications</i>                                                     | x |   |   |   |
| Estradiol                                                              | x |   |   |   |
| Levonorgestrel-ethinyl estradiol                                       | x | x | x | x |
| Alprazolam                                                             |   | x | x | x |
| Amitriptyline HCl                                                      |   |   | x | x |
| Nortriptyline HCl                                                      | x |   | x | x |
| Acetaminophen/caffeine/butalbital                                      | x | x | x | x |
| Divalproex sodium                                                      | x | x |   | x |
| Clonazepam                                                             | x |   |   |   |
| Benzonatate                                                            | x |   |   |   |

|                                                                                                                                  |   |   |   |   |
|----------------------------------------------------------------------------------------------------------------------------------|---|---|---|---|
| Carisoprodol                                                                                                                     | x |   |   |   |
| Metformin HCl                                                                                                                    |   | x | x | x |
| Lorazepam                                                                                                                        |   | x | x | x |
| Ketorolac tromethamine                                                                                                           |   | x | x | x |
| Baclofen                                                                                                                         | x |   |   |   |
| Albuterol sulfate                                                                                                                | x |   |   |   |
| Prednisone                                                                                                                       | x |   |   |   |
| Ibuprofen                                                                                                                        | x |   |   |   |
| Propranolol HCl                                                                                                                  |   | x | x | x |
| Prednisone                                                                                                                       |   | x | x | x |
| Penicillin V potassium                                                                                                           | x |   |   |   |
| Mometasone furoate                                                                                                               |   | x | x | x |
| Amoxicillin trihydrate                                                                                                           | x |   |   |   |
| Clindamycin HCl                                                                                                                  | x |   |   |   |
| Amphetamine/dextroamphetamine                                                                                                    |   | x | x | x |
| Metoprolol succinate                                                                                                             |   | x | x | x |
| Phenazopyridine HCl                                                                                                              | x |   |   |   |
| Ciprofloxacin HCl                                                                                                                | x | x | x | x |
| Seraltine HCl                                                                                                                    | x |   |   |   |
| Fluticasone propionate                                                                                                           | x |   |   |   |
| Tramadol HCl                                                                                                                     | x | x | x | x |
| Promethazine HCl                                                                                                                 | x |   |   |   |
| Zolmitriptan                                                                                                                     | x |   |   |   |
| Cephalexin monohydrate                                                                                                           | x |   |   |   |
| Ondansetron                                                                                                                      | x |   |   |   |
| Fluticasone/salmeterol                                                                                                           | x | x | x | x |
| Oseltamivir phosphate                                                                                                            | x |   |   |   |
| Ethinyl estradiol/Drospirenone                                                                                                   |   | x | x | x |
| Pantoprazole sodium                                                                                                              | x |   |   |   |
| Sumatriptan succinate                                                                                                            |   | x | x | x |
| Rizatriptan benzoate                                                                                                             |   | x | x | x |
| Eletriptan HBR                                                                                                                   | x |   |   |   |
| <i>Procedures</i>                                                                                                                | x |   |   |   |
| Computed tomography, head or brain; without contrast material (CPT 70450)                                                        | x | x | x | x |
| Magnetic resonance imaging, brain; without contrast material (CPT 70551)                                                         | x | x | x | x |
| Magnetic resonance imaging, brain; without contrast material, followed by contrast material(s) and further sequences (CPT 70553) | x | x | x | x |
| Vitamin D; 25 hydroxy (CPT 82306)                                                                                                |   | x | x | x |
| Cyanocobalamin (Vitamin B-12) (CPT 82607)                                                                                        | x | x | x | x |
| Troponin, quantitative (CPT 84484)                                                                                               |   | x | x | x |



|                                                                                                                                                                                                                                                            |   |   |   |   |
|------------------------------------------------------------------------------------------------------------------------------------------------------------------------------------------------------------------------------------------------------------|---|---|---|---|
| Sedimentation rate, erythrocyte; automated (CPT 85652)                                                                                                                                                                                                     |   | X | X | X |
| Culture, bacterial; quantitative colony count, urine (CPT 87086)                                                                                                                                                                                           |   | X | X | X |
| Routine electrocardiogram with at least 12 leads; with interpretation and report (CPT 93000)                                                                                                                                                               | X | X | X | X |
| Therapeutic, prophylactic, or diagnostic injection (specify substance or drug); subcutaneous or intramuscular (CPT 96372)                                                                                                                                  |   | X | X | X |
| Office or other outpatient visit for the evaluation and management of a new patient. Typically, 45 minutes are spent face-to-face with the patient and/or family (CPT 99204)                                                                               | X | X | X | X |
| Office or other outpatient visit for the evaluation and management of an established patient. Usually, the presenting problem(s) are minimal. Typically, 5 minutes are spent performing or supervising these services (CPT 99211)                          | X | X | X | X |
| Office or other outpatient visit for the evaluation and management of an established patient. Usually, the presenting problem(s) are self-limited or minor. Typically, 10 minutes are spent face-to-face with the patient and/or family (CPT 99212)        | X | X | X | X |
| Office or other outpatient visit for the evaluation and management of an established patient. Usually, the presenting problem(s) are of low to moderate severity. Typically, 15 minutes are spent face-to-face with the patient and/or family (CPT 99213)  | X |   |   |   |
| Office or other outpatient visit for the evaluation and management of an established patient. Usually, the presenting problem(s) are of moderate to high severity. Typically, 25 minutes are spent face-to-face with the patient and/or family (CPT 99214) | X |   |   |   |
| Office consultation for a new or established patient. Usually, the presenting problem(s) are of moderate to high severity. Typically, 60 minutes are spent face-to-face with the patient and/or family (CPT 99244)                                         | X | X | X | X |

|                                                                                                                                                                                                                    |   |   |   |   |
|--------------------------------------------------------------------------------------------------------------------------------------------------------------------------------------------------------------------|---|---|---|---|
| Office consultation for a new or established patient. Usually, the presenting problem(s) are of moderate to high severity. Typically, 80 minutes are spent face-to-face with the patient and/or family (CPT 99245) | x | x | x | x |
| Injection, ketorolac tromethamine, per 15 mg (HCPCS J1885)                                                                                                                                                         |   | x | x | x |
| Injection, ondansetron HCl, per 1 mg (HCPCS J2405)                                                                                                                                                                 | x | x | x | x |

**Supplemental Table 3 (online only). Retrospective cohort analysis: select characteristics of the subset of the migraine study population initiating prophylactic treatment occurring in the 12 months prior to treatment initiation who were unable to be matched on propensity score**

|                                                      | Comparison 1             |                              | Comparison 2             |                               | Comparison 3             |                               | Comparison 4             |                   |
|------------------------------------------------------|--------------------------|------------------------------|--------------------------|-------------------------------|--------------------------|-------------------------------|--------------------------|-------------------|
|                                                      | Topiramate<br>(N =3,191) | Cardiovascular<br>(N =4,152) | Topiramate<br>(N =1,701) | Antidepressants<br>(N =3,747) | Topiramate<br>(N =4,657) | Anticonvulsants<br>(N =2,230) | Topiramate<br>(N =7,589) | Other<br>(N =373) |
| Age in years* (mean, standard deviation)             | 36.7 (10.5)              | 49.4 (10.1)                  | 35.6 (10.0)              | 47.3 (11.0)                   | 35.6 (10.4)              | 50.2 (10.0)                   | 38.0 (11.2)              | 50.4 (9.9)        |
| Female* (n, %)                                       | 2,944 (92.3)             | 2,936 (70.7)                 | 1,505 (88.5)             | 3,124 (83.4)                  | 4,219 (90.6)             | 1,718 (77.0)                  | 6,572 (86.6)             | 302 (81.0)        |
| Prophylactic treatment history (n, %)                |                          |                              |                          |                               |                          |                               |                          |                   |
| Naïve new user                                       | 1,969 (61.7)             | 2,275 (54.8)                 | 1,220 (71.7)             | 1,276 (34.1)                  | 3,337 (71.7)             | 535 (24.0)                    | 4,728 (62.3)             | 30 (8.0)          |
| Switch new user                                      | 1,222 (38.3)             | 1,877 (45.2)                 | 481 (28.3)               | 2,471 (65.9)                  | 1,320 (28.3)             | 1,695 (76.0)                  | 2,861 (37.7)             | 343 (92.0)        |
| Healthcare utilization<br>(mean, standard deviation) |                          |                              |                          |                               |                          |                               |                          |                   |
| Number of physician visits                           | 10.8 (8.5)               | 12.9 (14.2)                  | 9.3 (6.8)                | 16.0 (15.9)                   | 8.8 (5.9)                | 19.2 (15.8)                   | 10.1 (8.0)               | 24.1 (27.8)       |
| Number of emergency department visits                | 2.0 (4.8)                | 2.2 (5.6)                    | 1.6 (4.0)                | 2.8 (6.7)                     | 1.6 (4.0)                | 3.1 (7.1)                     | 1.9 (4.7)                | 4.0 (8.7)         |
| Number of hospitalizations                           | 0.1 (0.4)                | 0.3 (0.8)                    | 0.1 (0.4)                | 0.3 (0.8)                     | 0.1 (0.3)                | 0.5 (1.1)                     | 0.1 (0.4)                | 0.7 (1.7)         |
| Other medications (n, %)                             |                          |                              |                          |                               |                          |                               |                          |                   |
| Opioids                                              | 1,699 (53.2)             | 2,280 (54.9)                 | 762 (44.8)               | 2,654 (70.8)                  | 1,993 (42.8)             | 1,812 (81.3)                  | 3,634 (47.9)             | 317 (85.0)        |
| Prescription NSAIDs                                  | 1,228 (38.5)             | 1,403 (33.8)                 | 569 (33.5)               | 1,709 (45.6)                  | 1,432 (30.7)             | 1,169 (52.4)                  | 2,583 (34.0)             | 201 (53.9)        |
| Antihyperlipidemics                                  | 178 (5.6)                | 1,068 (25.7)                 | 125 (7.3)                | 700 (18.7)                    | 244 (5.2)                | 528 (23.7)                    | 618 (8.1)                | 98 (26.3)         |
| Hormone replacement therapy                          | 227 (7.1)                | 455 (11.0)                   | 58 (3.4)                 | 636 (17.0)                    | 207 (4.4)                | 395 (17.7)                    | 453 (6.0)                | 98 (26.3)         |
| Triptan use†                                         |                          |                              |                          |                               |                          |                               |                          |                   |
| Eletriptan                                           | 330 (10.3)               | 492 (11.8)                   | NR                       | NR                            | NR                       | NR                            | NR                       | NR                |
| Zolmitriptan                                         | 64 (2.0)                 | 180 (4.3)                    | NR                       | NR                            | NR                       | NR                            | NR                       | NR                |
| Sumatriptan                                          | NR                       | NR                           | 694 (40.8)               | 1,309 (34.9)                  | 2,088 (44.8)             | 611 (27.4)                    | 3,074 (40.5)             | 97 (26.0)         |
| Rizatriptan                                          | NR                       | NR                           | 206 (12.1)               | 431 (11.5)                    | 649 (13.9)               | 195 (8.7)                     | 956 (12.6)               | 52 (13.9)         |
| Co-morbidities (n, %)                                |                          |                              |                          |                               |                          |                               |                          |                   |
| Depression                                           | 724 (22.7)               | 988 (23.8)                   | 186 (10.9)               | 1,738 (46.4)                  | 807 (17.3)               | 902 (40.4)                    | 1,575 (20.8)             | 159 (42.6)        |
| Hypertension                                         | 174 (5.5)                | 3,258 (78.5)                 | 431 (25.3)               | 1,059 (28.3)                  | 690 (14.8)               | 915 (41.0)                    | 1,479 (19.5)             | 158 (42.4)        |
| Hypercholesterolemia                                 | 557 (17.5)               | 1,866 (44.9)                 | 397 (23.3)               | 1,257 (33.5)                  | 832 (17.9)               | 872 (39.1)                    | 1,615 (21.3)             | 142 (38.1)        |
| Cardiac arrhythmia                                   | 90 (2.8)                 | 723 (17.4)                   | 78 (4.6)                 | 267 (7.1)                     | 139 (3.0)                | 269 (12.1)                    | 342 (4.5)                | 38 (10.2)         |
| Obesity                                              | 422 (13.2)               | 523 (12.6)                   | 390 (22.9)               | 292 (7.8)                     | 621 (13.3)               | 264 (11.8)                    | 1,056 (13.9)             | 37 (9.9)          |
| Asthma                                               | 356 (11.2)               | 431 (10.4)                   | 162 (9.5)                | 489 (13.1)                    | 372 (8.0)                | 376 (16.9)                    | 734 (9.7)                | 55 (14.7)         |
| Pregnancy                                            |                          |                              |                          |                               |                          |                               |                          |                   |
| Delivery indicators                                  | 97 (3.0)                 | 52 (1.3)                     | 57 (3.4)                 | 53 (1.4)                      | 139 (3.0)                | 27 (1.2)                      | 205 (2.7)                | 4 (1.1)           |
| Non-delivery indicators‡                             | 148 (4.6)                | 86 (2.1)                     | 76 (4.5)                 | 106 (2.8)                     | 207 (4.4)                | 53 (2.4)                      | 289 (3.8)                | 8 (2.1)           |

Abbreviations: NSAIDs, nonsteroidal antiinflammatory drugs; NR, not reported

\*Age and sex were assessed on the day of prophylactic treatment initiation.

†The triptan medications reported were identified empirically from the most frequently occurring medications dispensed and were selected for inclusion in the propensity score models via stepwise selection

‡Non-delivery indicators include indicators of pre-natal care (e.g., ultrasound and other obstetrical care)

**Supplemental Table 4 (online only). Nested case-control analysis: unadjusted and age group and sex-adjusted outcome odds ratios by select comorbidities and concomitant treatments in the 12 months prior to the case or control-defined event date**

| <b>Outcomes by comorbidity or concomitant treatment*</b> | <b>Cases</b> | <b>Controls</b> | <b>Unadjusted OR<br/>(95% CI)</b> | <b>Adjusted OR<br/>(95% CI)</b> |
|----------------------------------------------------------|--------------|-----------------|-----------------------------------|---------------------------------|
| <b>Myocardial infarction</b>                             | <b>182</b>   | <b>21,682</b>   |                                   |                                 |
| Depression                                               | 40 (22.0%)   | 3,882 (17.9%)   | 1.29 (0.91, 1.84)                 | 1.44 (1.01, 2.05)               |
| Hypertension                                             | 94 (51.6%)   | 4,592 (21.2%)   | 3.98 (2.97, 5.33)                 | 2.66 (1.97, 3.60)               |
| Hypercholesterolemia                                     | 94 (51.6%)   | 5,639 (26.0%)   | 3.04 (2.27, 4.07)                 | 1.90 (1.40, 2.58)               |
| Obesity                                                  | 29 (15.9%)   | 1,759 (8.1%)    | 2.15 (1.44, 3.20)                 | 2.25 (1.50, 3.36)               |
| Asthma                                                   | 18 (9.9%)    | 1,828 (8.4%)    | 1.19 (0.73, 1.94)                 | 1.30 (0.80, 2.13)               |
| Opioids                                                  | 102 (56.0%)  | 9,165 (42.3%)   | 1.74 (1.30, 2.34)                 | 1.66 (1.24, 2.24)               |
| Prescription NSAIDs                                      | 61 (33.5%)   | 6,293 (29.0%)   | 1.23 (0.91, 1.68)                 | 1.25 (0.91, 1.70)               |
| Hormone replacement therapy                              | 19 (10.4%)   | 2,156 (9.9%)    | 1.06 (0.66, 1.70)                 | 0.86 (0.52, 1.42)               |
| Antihyperlipidemics                                      | 62 (34.1%)   | 2,723 (12.6%)   | 3.60 (2.64, 4.90)                 | 2.10 (1.52, 2.90)               |
| Triptans                                                 | 97 (53.3%)   | 12,620 (58.2%)  | 0.82 (0.61, 1.10)                 | 0.78 (0.58, 1.04)               |
| Ergotamines                                              | 1 (0.5%)     | 190 (0.9%)      | 0.62 (0.09, 4.48)                 | 0.63 (0.09, 4.52)               |
| <b>Myocardial ischemia</b>                               | <b>31</b>    | <b>4,012</b>    |                                   |                                 |
| Depression                                               | 6 (19.4%)    | 734 (18.3%)     | 1.07 (0.44, 2.62)                 | 1.27 (0.51, 3.13)               |
| Hypertension                                             | 19 (61.3%)   | 829 (20.7%)     | 6.08 (2.94, 12.57)                | 4.13 (1.96, 8.73)               |
| Hypercholesterolemia                                     | 16 (51.6%)   | 1,055 (26.3%)   | 2.99 (1.47, 6.07)                 | 1.83 (0.88, 3.83)               |
| Obesity                                                  | 3 (9.7%)     | 311 (7.8%)      | 1.28 (0.39, 4.22)                 | 1.47 (0.44, 4.93)               |
| Asthma                                                   | 3 (9.7%)     | 358 (8.9%)      | 1.09 (0.33, 3.61)                 | 1.21 (0.36, 4.02)               |
| Opioids                                                  | 19 (61.3%)   | 1,704 (42.5%)   | 2.14 (1.04, 4.43)                 | 2.25 (1.08, 4.68)               |
| Prescription NSAIDs                                      | 14 (45.2%)   | 1,156 (28.8%)   | 2.03 (1.00, 4.14)                 | 1.99 (0.97, 4.06)               |
| Hormone replacement therapy                              | 4 (12.9%)    | 406 (10.1%)     | 1.32 (0.46, 3.78)                 | 1.00 (0.32, 3.06)               |
| Antihyperlipidemics                                      | 13 (41.9%)   | 486 (12.1%)     | 5.24 (2.55, 10.76)                | 2.99 (1.40, 6.40)               |
| Triptans                                                 | 11 (35.5%)   | 2,294 (57.2%)   | 0.41 (0.20, 0.86)                 | 0.41 (0.19, 0.86)               |
| Ergotamines                                              | 0 (0.0%)     | 27 (0.7%)       | —                                 | —                               |
| <b>Unstable angina</b>                                   | <b>84</b>    | <b>8,485</b>    |                                   |                                 |
| Depression                                               | 14 (16.7%)   | 1,574 (18.6%)   | 0.88 (0.49, 1.56)                 | 1.04 (0.58, 1.86)               |
| Hypertension                                             | 45 (53.6%)   | 1,768 (20.8%)   | 4.38 (2.85, 6.75)                 | 2.68 (1.71, 4.19)               |
| Hypercholesterolemia                                     | 44 (52.4%)   | 2,205 (26.0%)   | 3.13 (2.04, 4.82)                 | 1.76 (1.13, 2.75)               |
| Obesity                                                  | 11 (13.1%)   | 696 (8.2%)      | 1.69 (0.89, 3.19)                 | 1.63 (0.85, 3.10)               |
| Asthma                                                   | 8 (9.5%)     | 713 (8.4%)      | 1.15 (0.55, 2.39)                 | 1.44 (0.69, 3.04)               |
| Opioids                                                  | 44 (52.4%)   | 3,493 (41.2%)   | 1.57 (1.02, 2.42)                 | 1.51 (0.98, 2.33)               |
| Prescription NSAIDs                                      | 32 (38.1%)   | 2,419 (28.5%)   | 1.54 (0.99, 2.40)                 | 1.63 (1.04, 2.55)               |
| Hormone replacement therapy                              | 10 (11.9%)   | 860 (10.1%)     | 1.20 (0.62, 2.33)                 | 1.16 (0.57, 2.37)               |
| Antihyperlipidemics                                      | 24 (28.6%)   | 1,065 (12.6%)   | 2.79 (1.73, 4.49)                 | 1.28 (0.77, 2.11)               |
| Triptans                                                 | 40 (47.6%)   | 4,886 (57.6%)   | 0.67 (0.44, 1.03)                 | 0.67 (0.43, 1.04)               |
| Ergotamines                                              | 0 (0.0%)     | 62 (0.7%)       | —                                 | —                               |
| <b>Ischemic stroke</b>                                   | <b>328</b>   | <b>39,318</b>   |                                   |                                 |
| Depression                                               | 93 (28.4%)   | 6,965 (17.7%)   | 1.84 (1.44, 2.34)                 | 1.92 (1.51, 2.45)               |
| Hypertension                                             | 168 (51.2%)  | 8,297 (21.1%)   | 3.93 (3.16, 4.88)                 | 3.21 (2.56, 4.03)               |
| Hypercholesterolemia                                     | 150 (45.7%)  | 10,092 (25.7%)  | 2.44 (1.96, 3.04)                 | 1.88 (1.49, 2.37)               |
| Obesity                                                  | 53 (16.2%)   | 3,198 (8.1%)    | 2.18 (1.62, 2.93)                 | 2.25 (1.67, 3.02)               |

|                                                     |             |                |                   |                   |
|-----------------------------------------------------|-------------|----------------|-------------------|-------------------|
| Asthma                                              | 47 (14.3%)  | 3,382 (8.6%)   | 1.78 (1.30, 2.43) | 1.88 (1.38, 2.57) |
| Opioids                                             | 205 (62.5%) | 16,617 (42.3%) | 2.28 (1.82, 2.85) | 2.21 (1.77, 2.77) |
| Prescription NSAIDs                                 | 128 (39.0%) | 11,470 (29.2%) | 1.55 (1.24, 1.94) | 1.56 (1.24, 1.95) |
| Hormone replacement therapy                         | 33 (10.1%)  | 3,956 (10.1%)  | 1.00 (0.70, 1.44) | 0.79 (0.54, 1.16) |
| Antihyperlipidemics                                 | 94 (28.7%)  | 4,756 (12.1%)  | 2.92 (2.29, 3.72) | 2.14 (1.66, 2.77) |
| Triptans                                            | 134 (40.9%) | 22,945 (58.4%) | 0.49 (0.40, 0.61) | 0.46 (0.37, 0.58) |
| Ergotamines                                         | 2 (0.6%)    | 332 (0.8%)     | 0.72 (0.18, 2.91) | 0.69 (0.17, 2.79) |
| <b>Hemorrhagic stroke</b>                           | <b>106</b>  | <b>12,904</b>  |                   |                   |
| Depression                                          | 32 (30.2%)  | 2,310 (17.9%)  | 1.98 (1.31, 3.01) | 2.03 (1.33, 3.09) |
| Hypertension                                        | 34 (32.1%)  | 2,711 (21.0%)  | 1.78 (1.18, 2.68) | 1.47 (0.96, 2.25) |
| Hypercholesterolemia                                | 42 (39.6%)  | 3,299 (25.6%)  | 1.91 (1.29, 2.83) | 1.56 (1.02, 2.37) |
| Obesity                                             | 13 (12.3%)  | 1,028 (8.0%)   | 1.61 (0.90, 2.90) | 1.68 (0.93, 3.01) |
| Asthma                                              | 11 (10.4%)  | 1,147 (8.9%)   | 1.19 (0.63, 2.22) | 1.24 (0.66, 2.33) |
| Opioids                                             | 61 (57.5%)  | 5,489 (42.5%)  | 1.83 (1.24, 2.70) | 1.80 (1.22, 2.65) |
| Prescription NSAIDs                                 | 31 (29.2%)  | 3,771 (29.2%)  | 1.00 (0.66, 1.52) | 0.99 (0.65, 1.51) |
| Hormone replacement therapy                         | 7 (6.6%)    | 1,300 (10.1%)  | 0.63 (0.29, 1.36) | 0.48 (0.22, 1.07) |
| Antihyperlipidemics                                 | 23 (21.7%)  | 1,569 (12.2%)  | 2.00 (1.26, 3.19) | 1.54 (0.94, 2.52) |
| Triptans                                            | 59 (55.7%)  | 7,494 (58.1%)  | 0.91 (0.62, 1.33) | 0.88 (0.60, 1.29) |
| Ergotamines                                         | 2 (1.9%)    | 103 (0.8%)     | 2.39 (0.58, 9.81) | 2.29 (0.56, 9.42) |
| <b>Transient ischemic attack</b>                    | <b>71</b>   | <b>8,562</b>   |                   |                   |
| Depression                                          | 19 (26.8%)  | 1,527 (17.8%)  | 1.68 (0.99, 2.86) | 1.70 (1.00, 2.88) |
| Hypertension                                        | 33 (46.5%)  | 1,825 (21.3%)  | 3.21 (2.01, 5.13) | 2.46 (1.51, 4.01) |
| Hypercholesterolemia                                | 34 (47.9%)  | 2,175 (25.4%)  | 2.70 (1.69, 4.31) | 1.96 (1.19, 3.20) |
| Obesity                                             | 11 (15.5%)  | 678 (7.9%)     | 2.13 (1.12, 4.08) | 2.16 (1.13, 4.14) |
| Asthma                                              | 14 (19.7%)  | 726 (8.5%)     | 2.65 (1.47, 4.78) | 2.63 (1.45, 4.76) |
| Opioids                                             | 39 (54.9%)  | 3,684 (43.0%)  | 1.61 (1.01, 2.58) | 1.54 (0.96, 2.47) |
| Prescription NSAIDs                                 | 34 (47.9%)  | 2,525 (29.5%)  | 2.20 (1.38, 3.51) | 2.07 (1.30, 3.32) |
| Hormone replacement therapy                         | 8 (11.3%)   | 874 (10.2%)    | 1.12 (0.53, 2.34) | 0.68 (0.32, 1.47) |
| Antihyperlipidemics                                 | 18 (25.4%)  | 967 (11.3%)    | 2.67 (1.56, 4.57) | 1.80 (1.03, 3.17) |
| Triptans                                            | 30 (42.3%)  | 5,041 (58.9%)  | 0.51 (0.32, 0.82) | 0.46 (0.29, 0.74) |
| Ergotamines                                         | 0 (0.0%)    | 69 (0.8%)      | —                 | —                 |
| <b>Overall mortality</b>                            | <b>234</b>  | <b>36,974</b>  |                   |                   |
| Depression                                          | 94 (40.2%)  | 6,578 (17.8%)  | 3.10 (2.39, 4.03) | 3.30 (2.53, 4.30) |
| Hypertension                                        | 116 (49.6%) | 7,990 (21.6%)  | 3.57 (2.76, 4.61) | 2.75 (2.10, 3.60) |
| Hypercholesterolemia                                | 79 (33.8%)  | 9,562 (25.9%)  | 1.46 (1.11, 1.92) | 1.00 (0.75, 1.32) |
| Obesity                                             | 30 (12.8%)  | 3,006 (8.1%)   | 1.66 (1.13, 2.44) | 1.73 (1.17, 2.54) |
| Asthma                                              | 34 (14.5%)  | 3,156 (8.5%)   | 1.82 (1.26, 2.63) | 1.92 (1.33, 2.77) |
| Opioids                                             | 189 (80.8%) | 15,658 (42.3%) | 5.72 (4.13, 7.92) | 5.55 (4.00, 7.69) |
| Prescription NSAIDs                                 | 91 (38.9%)  | 10,837 (29.3%) | 1.53 (1.18, 2.00) | 1.55 (1.19, 2.02) |
| Hormone replacement therapy                         | 19 (8.1%)   | 3,772 (10.2%)  | 0.78 (0.49, 1.25) | 0.59 (0.36, 0.95) |
| Antihyperlipidemics                                 | 39 (16.7%)  | 4,619 (12.5%)  | 1.40 (0.99, 1.98) | 0.89 (0.62, 1.27) |
| Triptans                                            | 119 (50.9%) | 21,565 (58.3%) | 0.74 (0.57, 0.96) | 0.69 (0.54, 0.90) |
| Ergotamines                                         | 1 (0.4%)    | 288 (0.8%)     | 0.55 (0.08, 3.91) | 0.52 (0.07, 3.70) |
| <b>Cardiovascular and cerebrovascular mortality</b> | <b>27</b>   | <b>4,551</b>   |                   |                   |
| Depression                                          | 10 (37.0%)  | 800 (17.6%)    | 2.76 (1.26, 6.05) | 2.89 (1.31, 6.37) |
| Hypertension                                        | 10 (37.0%)  | 987 (21.7%)    | 2.12 (0.97, 4.65) | 1.54 (0.68, 3.51) |

|                                            |            |               |                    |                    |
|--------------------------------------------|------------|---------------|--------------------|--------------------|
| Hypercholesterolemia                       | 13 (48.1%) | 1,169 (25.7%) | 2.69 (1.26, 5.73)  | 1.92 (0.85, 4.33)  |
| Obesity                                    | 2 (7.4%)   | 337 (7.4%)    | 1.00 (0.24, 4.24)  | 0.98 (0.23, 4.18)  |
| Asthma                                     | 2 (7.4%)   | 365 (8.0%)    | 0.92 (0.22, 3.89)  | 0.94 (0.22, 4.01)  |
| Opioids                                    | 20 (74.1%) | 1,959 (43.0%) | 3.78 (1.60, 8.95)  | 3.65 (1.54, 8.67)  |
| Prescription NSAIDs                        | 14 (51.9%) | 1,318 (29.0%) | 2.64 (1.24, 5.64)  | 2.72 (1.27, 5.81)  |
| Hormone replacement therapy                | 2 (7.4%)   | 466 (10.2%)   | 0.70 (0.17, 2.97)  | 0.45 (0.10, 2.00)  |
| Antihyperlipidemics                        | 7 (25.9%)  | 542 (11.9%)   | 2.59 (1.09, 6.15)  | 1.66 (0.66, 4.19)  |
| Triptans                                   | 10 (37.0%) | 2,619 (57.5%) | 0.43 (0.20, 0.95)  | 0.40 (0.18, 0.87)  |
| Ergotamines                                | 0 (0.0%)   | 33 (0.7%)     | —                  | —                  |
| <b>Mortality from trauma</b>               | <b>77</b>  | <b>9,090</b>  |                    |                    |
| Depression                                 | 39 (50.6%) | 1,650 (18.2%) | 4.63 (2.95, 7.26)  | 5.02 (3.19, 7.91)  |
| Hypertension                               | 31 (40.3%) | 1,878 (20.7%) | 2.59 (1.64, 4.09)  | 2.64 (1.62, 4.28)  |
| Hypercholesterolemia                       | 23 (29.9%) | 2,334 (25.7%) | 1.23 (0.76, 2.01)  | 1.19 (0.71, 1.99)  |
| Obesity                                    | 8 (10.4%)  | 702 (7.7%)    | 1.39 (0.66, 2.89)  | 1.44 (0.69, 3.01)  |
| Asthma                                     | 15 (19.5%) | 754 (8.3%)    | 2.67 (1.51, 4.72)  | 2.90 (1.64, 5.14)  |
| Opioids                                    | 56 (72.7%) | 3,929 (43.2%) | 3.50 (2.12, 5.79)  | 3.62 (2.19, 6.01)  |
| Prescription NSAIDs                        | 25 (32.5%) | 2,618 (28.8%) | 1.19 (0.74, 1.92)  | 1.23 (0.76, 1.99)  |
| Hormone replacement therapy                | 8 (10.4%)  | 922 (10.1%)   | 1.03 (0.49, 2.14)  | 1.48 (0.67, 3.26)  |
| Antihyperlipidemics                        | 12 (15.6%) | 1,134 (12.5%) | 1.30 (0.70, 2.41)  | 1.19 (0.62, 2.29)  |
| Triptans                                   | 36 (46.8%) | 5,224 (57.5%) | 0.65 (0.41, 1.02)  | 0.68 (0.43, 1.08)  |
| Ergotamines                                | 1 (1.3%)   | 78 (0.9%)     | 1.52 (0.21, 11.07) | 1.53 (0.21, 11.21) |
| <b>Mortality ascribed to drug overdose</b> | <b>45</b>  | <b>5,506</b>  |                    |                    |
| Depression                                 | 24 (53.3%) | 972 (17.7%)   | 5.33 (2.96, 9.61)  | 5.84 (3.22, 10.60) |
| Hypertension                               | 23 (51.1%) | 1,189 (21.6%) | 3.80 (2.11, 6.83)  | 4.00 (2.14, 7.48)  |
| Hypercholesterolemia                       | 14 (31.1%) | 1,396 (25.4%) | 1.33 (0.71, 2.51)  | 1.24 (0.63, 2.43)  |
| Obesity                                    | 6 (13.3%)  | 444 (8.1%)    | 1.75 (0.74, 4.17)  | 1.83 (0.77, 4.37)  |
| Asthma                                     | 10 (22.2%) | 500 (9.1%)    | 2.86 (1.41, 5.81)  | 3.03 (1.48, 6.18)  |
| Opioids                                    | 38 (84.4%) | 2,306 (41.9%) | 7.53 (3.36, 16.90) | 7.50 (3.34, 16.86) |
| Prescription NSAIDs                        | 20 (44.4%) | 1,630 (29.6%) | 1.90 (1.05, 3.43)  | 1.95 (1.08, 3.53)  |
| Hormone replacement therapy                | 3 (6.7%)   | 553 (10.0%)   | 0.64 (0.20, 2.07)  | 0.76 (0.23, 2.59)  |
| Antihyperlipidemics                        | 8 (17.8%)  | 669 (12.2%)   | 1.56 (0.72, 3.37)  | 1.44 (0.64, 3.24)  |
| Triptans                                   | 19 (42.2%) | 3,183 (57.8%) | 0.53 (0.29, 0.97)  | 0.55 (0.30, 0.99)  |
| Ergotamines                                | 0 (0.0%)   | 52 (0.9%)     | —                  | —                  |

Abbreviations: OR, odds ratio; CI, confidence interval; NSAIDs, nonsteroidal antiinflammatory drugs

\*Patients may have multiple comorbidities or concomitant treatments prior to the case or control-defined event date. The odds ratios compared the presence versus no presence of the specified comorbidity or concomitant treatment in the 12 months prior to the case or control-defined event date.

**Supplemental Table 5 (online only). Nested case-control analysis: unadjusted and adjusted outcome odds ratios among cases and controls with topiramate use in the 3 months prior to the case or control-defined event date**

| <b>Outcome*</b>                                     | <b>Cases</b>   | <b>Controls</b>   | <b>Unadjusted OR<br/>(95% CI)</b> | <b>Adjusted OR<br/>(95% CI)<sup>†,‡</sup></b> |
|-----------------------------------------------------|----------------|-------------------|-----------------------------------|-----------------------------------------------|
| <b>Myocardial infarction</b>                        | <b>N = 161</b> | <b>N = 20,528</b> |                                   |                                               |
| Topiramate                                          | 21             | 2,417             | 1.04 (0.66, 1.64)                 | 1.09 (0.65, 1.81)                             |
| <b>Myocardial ischemia<sup>§</sup></b>              | <b>26</b>      | <b>3,787</b>      |                                   |                                               |
| Topiramate                                          | 7              | 469               | 2.20 (0.94, 5.14)                 | 2.52 (0.96, 6.65)                             |
| <b>Unstable angina<sup>¶</sup></b>                  | <b>70</b>      | <b>7,981</b>      |                                   |                                               |
| Topiramate                                          | 10             | 974               | 1.04 (0.54, 2.02)                 | 0.92 (0.41, 2.07)                             |
| <b>Ischemic stroke</b>                              | <b>294</b>     | <b>37,162</b>     |                                   |                                               |
| Topiramate                                          | 56             | 4,427             | 1.62 (1.22, 2.17)                 | 1.36 (0.98, 1.90)                             |
| <b>Hemorrhagic stroke</b>                           | <b>94</b>      | <b>12,193</b>     |                                   |                                               |
| Topiramate                                          | 11             | 1,443             | 0.92 (0.49, 1.72)                 | 0.69 (0.33, 1.41)                             |
| <b>Transient ischemic attack</b>                    | <b>63</b>      | <b>8,156</b>      |                                   |                                               |
| Topiramate                                          | 18             | 972               | 2.65 (1.55, 4.55)                 | 2.08 (1.11, 3.91)                             |
| <b>Overall mortality</b>                            | <b>210</b>     | <b>34,836</b>     |                                   |                                               |
| Topiramate                                          | 18             | 4,225             | 0.65 (0.40, 1.05)                 | 0.44 (0.25, 0.78)                             |
| <b>Cardiovascular and cerebrovascular mortality</b> | <b>23</b>      | <b>4,254</b>      |                                   |                                               |
| Topiramate                                          | 8              | 1,044             | 0.89 (0.43, 1.86)                 | 0.74 (0.32, 1.69)                             |
| <b>Mortality ascribed to trauma</b>                 | <b>74</b>      | <b>8,552</b>      |                                   |                                               |
| Topiramate                                          | 5              | 633               | 0.96 (0.38, 2.45)                 | 0.39 (0.12, 1.24)                             |
| <b>Mortality ascribed to drug overdose</b>          | <b>41</b>      | <b>5,181</b>      |                                   |                                               |
| Topiramate                                          | 3              | 511               | 0.99 (0.30, 3.29)                 | 0.37 (0.08, 1.82)                             |

Abbreviations: OR, odds ratio; CI, confidence interval

\*Patients may have been exposed to multiple prophylactic medications prior to the case or control-defined event date. The odds ratios compared any use of topiramate to no use of topiramate in the 3 months prior to the case or control-defined event date.

<sup>†</sup>Except where noted, regression models comparing topiramate exposure to non-exposure were adjusted for age group, sex, and presence of hypertension, depression, other anticonvulsants, beta blockers, tricyclic antidepressants, serotonin norepinephrine reuptake inhibitors, calcium channel blockers, antihypertensives, and other prophylactic treatments prior to the topiramate dispensing.

<sup>‡</sup>Adjustment for age group in the regression models was done using the following categories (in years): 18-24, 25-34, 35-44, 45-54, 55-65, >65. Due to the small number of cases within certain age strata, age groups were collapsed for select outcome regression models as follows: myocardial infarction, unstable angina, transient ischemic attack: 18-34, 35-44, 45-54, 55-65, >65; myocardial ischemia: 18-44, 45-54, 55-65, >65.

<sup>§</sup>Due to sample size constraints, the regression model was adjusted for age group, sex, and presence of hypertension, depression, other anticonvulsants, cardiovascular treatments (consisting of beta blockers, calcium channel blockers, antihypertensives), antidepressants (consisting of tricyclic antidepressants, serotonin norepinephrine reuptake inhibitors) and other prophylactic treatments prior to the topiramate dispensing.

<sup>¶</sup>The regression model was adjusted for age group and sex due to sample size constraints.
